# Supplementary material for: Comparative efficacy of Vector Guard® to Olyset® Plus insecticide-treated nets against strongly pyrethroid-resistant Anopheles arabiensis in experimental huts in Tanzania
Source: Frontiers journal article supplement (doi:10.3389/fmala.2024.1507392), 2024-12-24
Supplement: Table_3.xlsx [file Table_3.xlsx]

## Sheet: PostWashPostTunnel
Study code	Serial No.	dateoftest	mosquitospecies	age	performed by	tunnel_no	bait	netcode	net position	exposed	c1fd12hr	c1ud12hr	c1fa12hr	c1ua12hr	c1t12hr	c2fd12hr	c2ud12hr	c2fa12hr	c2ua12hr	c2t12hr	temperature12	humidity12
63	1	44769	1	5-8	MSA	1	T-074	0	0	100	0	0	12	47	59	0	0	41	0	41	24.8	79.2
63	1	44769	1	5-8	MSA	2	A-009	1201	0	100	0	84	0	3	87	0	3	5	5	13	24.8	79.2
63	1	44769	1	5-8	MSA	3	T-007	1204	0	100	0	73	0	21	94	0	0	6	0	6	24.8	79.2
63	1	44769	1	5-8	MSA	4	A-033	1001	0	100	0	82	0	18	100	0	0	0	0	0	24.8	79.2
63	1	44769	1	5-8	MSA	5	T-090	1002	0	100	0	76	0	17	93	1	2	3	1	7	24.8	79.2
63	1	44769	1	5-8	MSA	6	T-051	1003	0	100	0	33	0	35	68	0	16	7	8	31	24.8	79.2
63	2	44771	1	5-8	MSA	1	T-074	0	0	100	0	4	12	43	59	0	0	41	0	41	25	87.8
63	2	44771	1	5-8	MSA	2	A-009	1201	0	100	0	84	0	3	87	2	4	3	4	13	25	87.8
63	2	44771	1	5-8	MSA	3	T-007	1204	0	100	0	75	0	19	94	1	0	5	0	6	25	87.8
63	2	44771	1	5-8	MSA	4	A-033	1001	0	100	0	77	0	23	100	0	0	0	0	0	25	87.8
63	2	44771	1	5-8	MSA	5	T-090	1002	0	100	0	72	0	21	93	2	2	2	1	7	25	87.8
63	2	44771	1	5-8	MSA	6	T-051	1003	0	100	0	46	0	22	68	0	16	7	8	31	25	87.8
63	3	44770	2	5-8	MSA	1	T-064	0	0	100	0	0	8	27	35	0	0	51	14	65	24.4	83.2
63	3	44770	2	5-8	MSA	2	T-072	1201	0	100	0	63	0	23	86	0	3	3	8	14	24.4	83.2
63	3	44770	2	5-8	MSA	3	T-089	1204	0	100	0	68	0	14	82	1	10	1	6	18	24.4	83.2
63	3	44770	2	5-8	MSA	4	T-091	1001	0	100	0	71	0	27	98	0	0	0	2	2	24.4	83.2
63	3	44770	2	5-8	MSA	5	T-006	1002	0	100	0	84	0	9	93	0	2	0	5	7	24.4	83.2
63	3	44770	2	5-8	MSA	6	T-019	1003	0	100	0	64	0	19	83	0	1	2	14	17	24.4	83.2
63	3	44770	2	5-8	MSA	7	T-054	2001	0	100	0	90	0	8	98	0	0	0	0	0	24.4	83.2
63	3	44770	2	5-8	MSA	8	T-058	2003	0	100	0	88	0	12	100	0	0	0	0	0	24.4	83.2
63	4	44772	2	5-8	MSA	1	T-064	0	0	100	1	2	7	25	35	1	1	50	13	65	25.3	85.4
63	4	44772	2	5-8	MSA	2	T-072	1201	0	100	0	72	0	14	86	0	4	3	7	14	25.3	85.4
63	4	44772	2	5-8	MSA	3	T-089	1204	0	100	0	71	0	11	81	1	10	1	6	18	25.3	85.4
63	4	44772	2	5-8	MSA	4	T-091	1001	0	100	0	73	0	25	98	0	1	0	1	2	25.3	85.4
63	4	44772	2	5-8	MSA	5	T-006	1002	0	100	0	68	0	25	93	0	2	0	5	7	25.3	85.4
63	4	44772	2	5-8	MSA	6	T-019	1003	0	100	0	63	0	20	83	0	5	2	10	17	25.3	85.4
63	4	44772	2	5-8	MSA	7	T-054	2001	0	100	0	70	0	28	98	0	0	0	0	0	25.3	85.4
63	4	44772	2	5-8	MSA	8	T-058	2003	0	100	0	74	0	26	100	0	0	0	0	0	25.3	85.4

## Sheet: Data dictionary
ITEM	CODE	EXPLANATOR
study code		Name of the project eg BIT 000
serial no.		unique number of the individual data sheet
dateoftest		Date on which the test occurred
mosquitospecies		Code for mosquito species from code sheet.
age		age of test system in days
performed by		initials of the technician who perfomed the test.
tunnel_no		Identifier for the tunnel being used
bait		what was placed at the end of the tunnel to lure the mosquitos, rabbit unique ID
netcode		Identifier for the net being used
exposed		number of mosquitos exposed
netcode	1001, 1002, 1003	post wash olyset plus
	1201, 1204	post hut washed olyset plus
	2001, 2003	post wash vector guard roof
c1fd12hr		Number of fed and dead mosquitos in Chamber1"
c1ud12hr		Number of unfed and dead mosquitos in Chamber 1"
c1fa12hr		Number of fed and alive mosquitos in Chamber 1"
c1ua12hr		Number of unfed and alive mosquitos in Chamber 1"
c1t12hr		Total number of mosquitos in Chamber 1"
c2fd12hr		Number of fed and dead mosquitos in Chamber 2"
c2ud12hr		Number of unfed and dead mosquitos in Chamber 2"
c2fa12hr		Number of fed and alive mosquitos in Chamber 2"
c2ua12hr		Number of unfed and alive mosquitos in Chamber 2"
c2t12hr		Total number of mosquitos in Chamber 2"
mosquito species	1	susceptible gambiae
	2	resistant arabiensis
temperature12		temperature in degrees C after 12 hours
humidity12		Relative Humidity at 12 hours
